# Supplementary material for: Binding Heterogeneity of Plasmodium falciparum to Engineered 3D Brain Microvessels Is Mediated by EPCR and ICAM-1
Source: PubMed Central journal article supplement (PMC6538777; doi:10.1128/mbio.00420-19), 2019-05-28

**A**

**IT4VAR19 (DC8)**

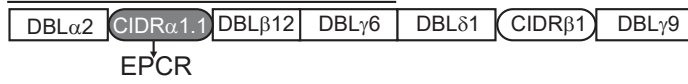

**ITVAR20: 2G2 Knobless (DC8)**

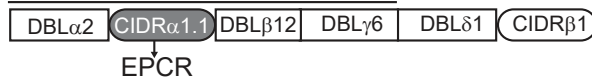

**HB3VAR03 (Group A)**

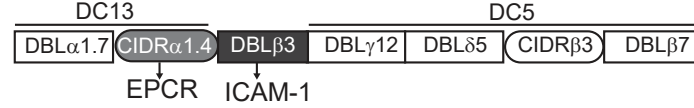

**IT4VAR16: ITGICAM-1 (Group B)**

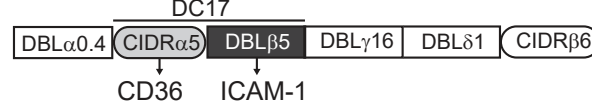

**B**

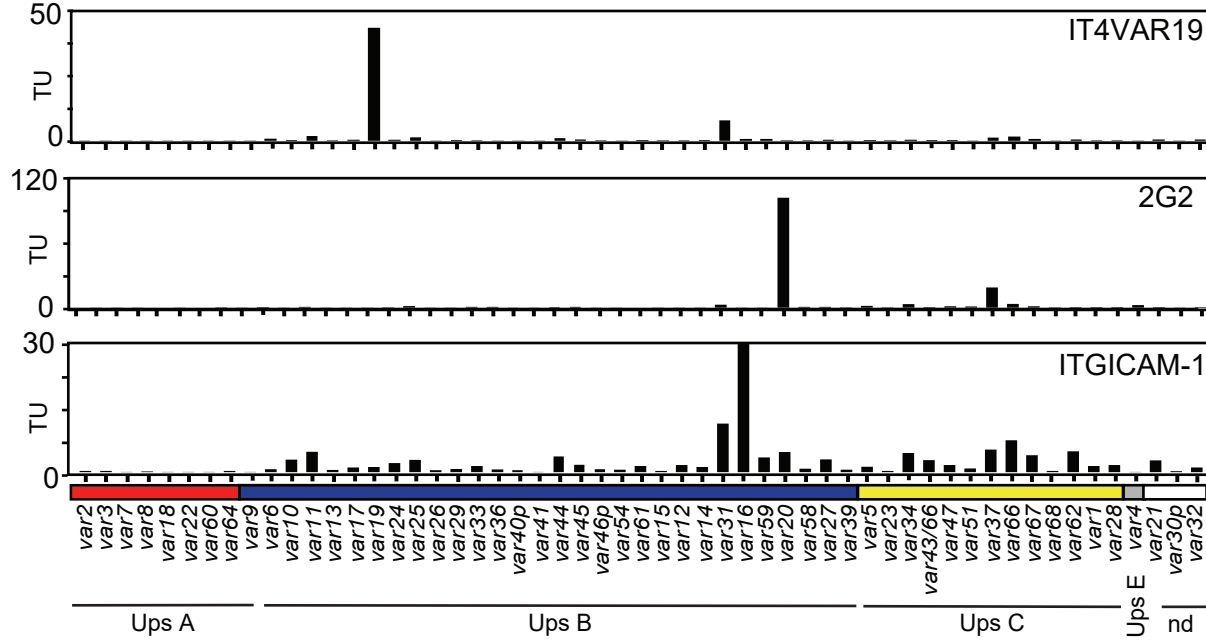

**C**

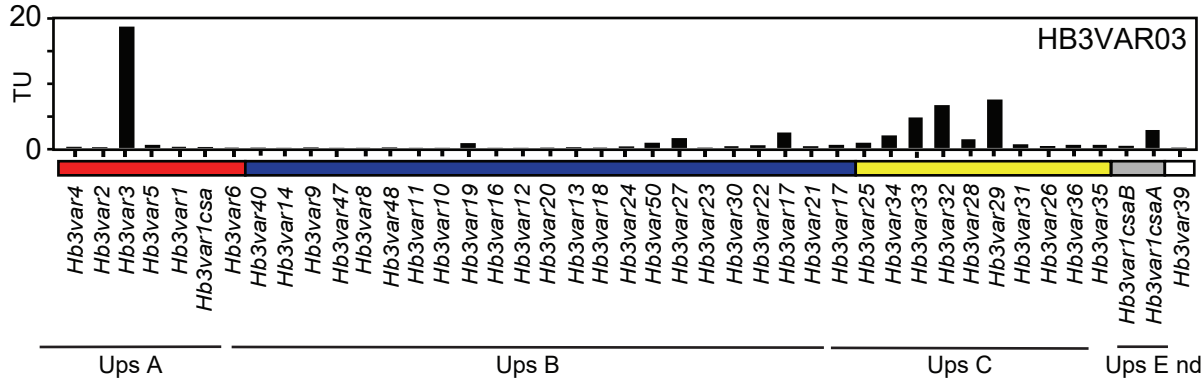

Supplement: mBio.00420-19-sf002.pdf [file mBio.00420-19-sf002.pdf]
