# Supplementary material for: Binding Heterogeneity of Plasmodium falciparum to Engineered 3D Brain Microvessels Is Mediated by EPCR and ICAM-1
Source: PubMed Central journal article supplement (PMC6538777; doi:10.1128/mbio.00420-19), 2019-05-28

**A**

**i**

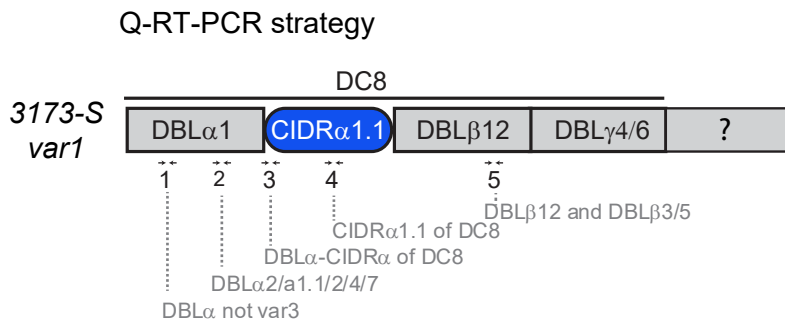

**B**

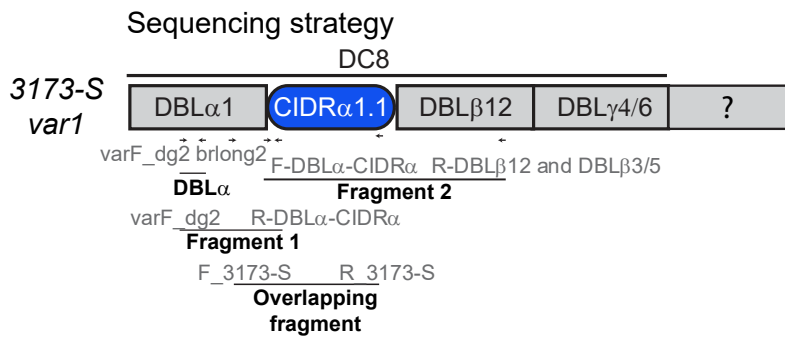

**C**

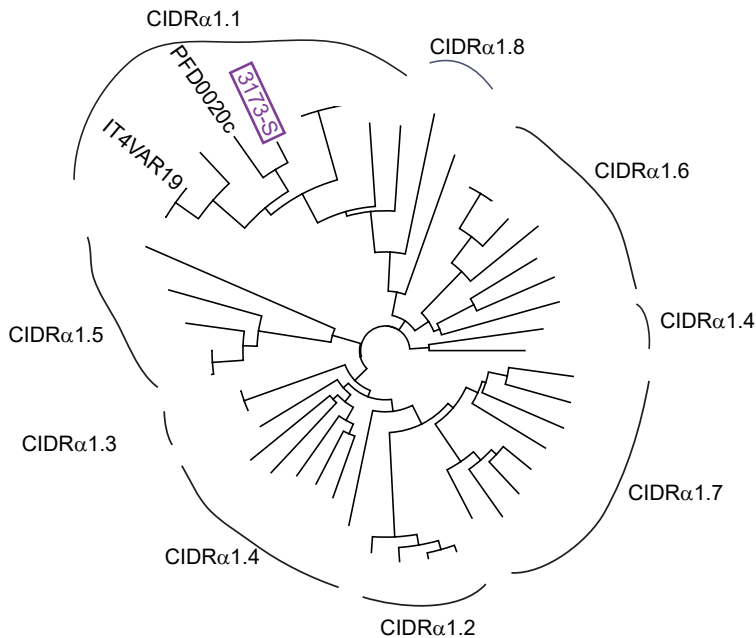

**ii**

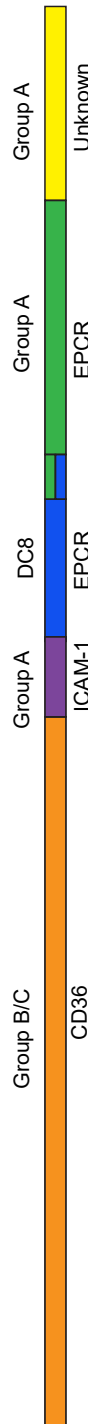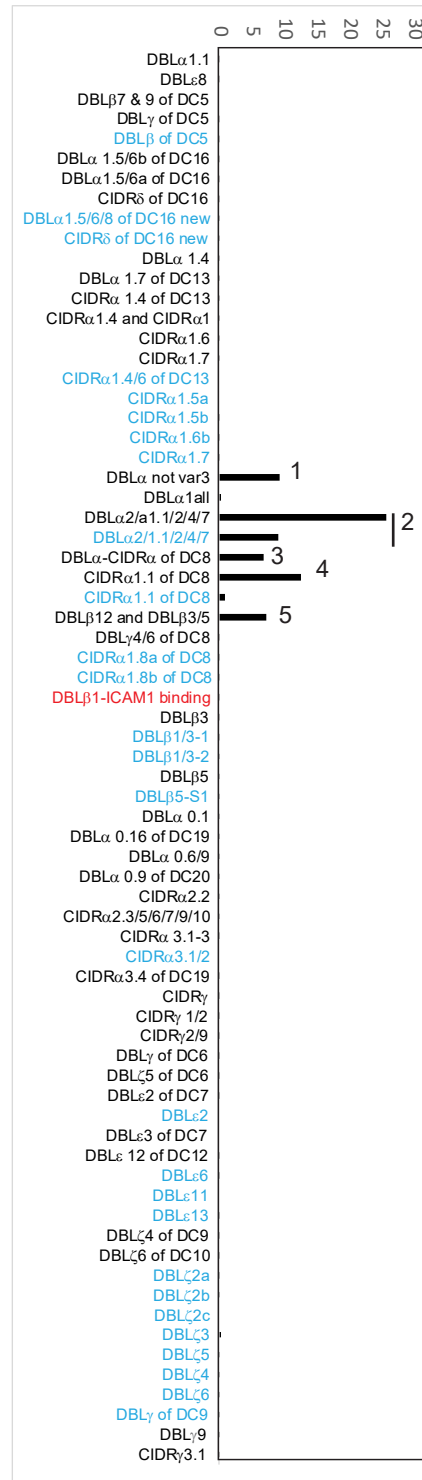

Supplement: mBio.00420-19-sf006.pdf [file mBio.00420-19-sf006.pdf]
